# Supplementary material
Source: publisher figshare collection journal article supplement (https://acs.figshare.com/ndownloader/files/4302592)
Supplement: Supplementary file 1 [file 4302592]

# Sodium Fluoride-Assisted Modulation of Anodised TiO<sub>2</sub> Nanotube for Dye-Sensitised Solar Cells Application

*Jung-Ho Yun<sup>†</sup>, Yun Hau Ng<sup>†</sup>, Changhui Ye<sup>‡</sup>, Attila J. Mozer<sup>\*,§</sup>, Gordon G. Wallace<sup>§</sup> and Rose Amal<sup>\*,†</sup>*

<sup>†</sup> ARC Centre of Excellence for Functional Nanomaterials

School of Chemical Engineering, the University of New South Wales,  
Sydney, NSW 2052, Australia

<sup>‡</sup> Key Laboratory of Materials Physics, Institute of Solid State Physics,

Chinese Academy of Sciences, Hefei, China

<sup>§</sup> Intelligent Polymer Research Institute, ARC Centre of Excellence for Electromaterials Science,  
University of Wollongong, Wollongong, NSW 2522, Australia

Corresponding autor. Email : <sup>\*,†</sup> r.amal@unsw.edu.au <sup>\*,§</sup> attila@uow.edu.au

When high water concentration (50 wt. %) in electrolyte was employed to anodisation of Ti foil,  $\text{TiO}_2$  particles were formed instead of a TNT array. The SEM image of  $\text{TiO}_2$  particles was shown in the Figure S1.

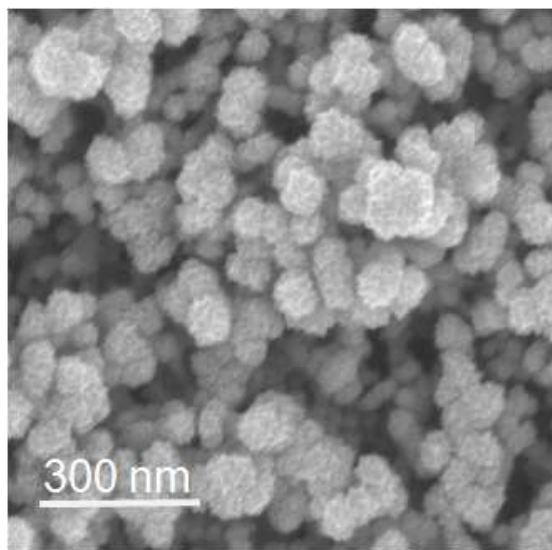

Figure S1. SEM image of Ti foil anodised at 60 V in ethylene glycol based electrolyte with 0.5 wt. % NaF and 50 wt. % water
